# Supplementary material
Source: PubMed Central journal article supplement (PMC3873633)
Supplement: NIHMS506768-supplement-2.pdf [file NIHMS506768-supplement-2.pdf]

Supplementary Table 1.

| Variable                       | <i>VEHICLE</i><br>CV, %<br>(min-max) | <i>RALOXIFENE</i><br>CV, %<br>(min-max) |
|--------------------------------|--------------------------------------|-----------------------------------------|
| ID <sup>(1st)</sup> , μm       | 27<br>(16 – 44)                      | 14<br>(2 – 32)                          |
| Energy <sup>(1st)</sup> , μJ   | 33<br>(28 – 35)                      | 16<br>(6 – 45)                          |
| US <sup>(1st)</sup> , N/μm     | 5<br>(3 – 13)                        | 5<br>(3 – 9)                            |
| CID <sup>(1st)</sup> , μm      | 30<br>(11 – 46)                      | 35<br>(11 – 72)                         |
| IDI, μm                        | 19<br>(10 – 33)                      | 19<br>(3 – 40)                          |
| TID, μm                        | 26<br>(15 – 43)                      | 13<br>(3 – 30)                          |
| Energy <sup>(Total)</sup> , μJ | 27<br>(21 – 36)                      | 15<br>(6 – 34)                          |

ID(1st), first cycle indentation distance; Energy(1st), first cycle energy; US(1st), first cycle unloading slope; CID(1st), first cycle creep indentation distance; IDI, indentation distance increase; TID, total indentation distance; Energy(Total), total energy.
